# Supplementary material
Source: publisher figshare collection journal article supplement (https://gsajournals.figshare.com/articles/dataset/_/7575536)
Supplement: Supplementary file 1 [file 1]

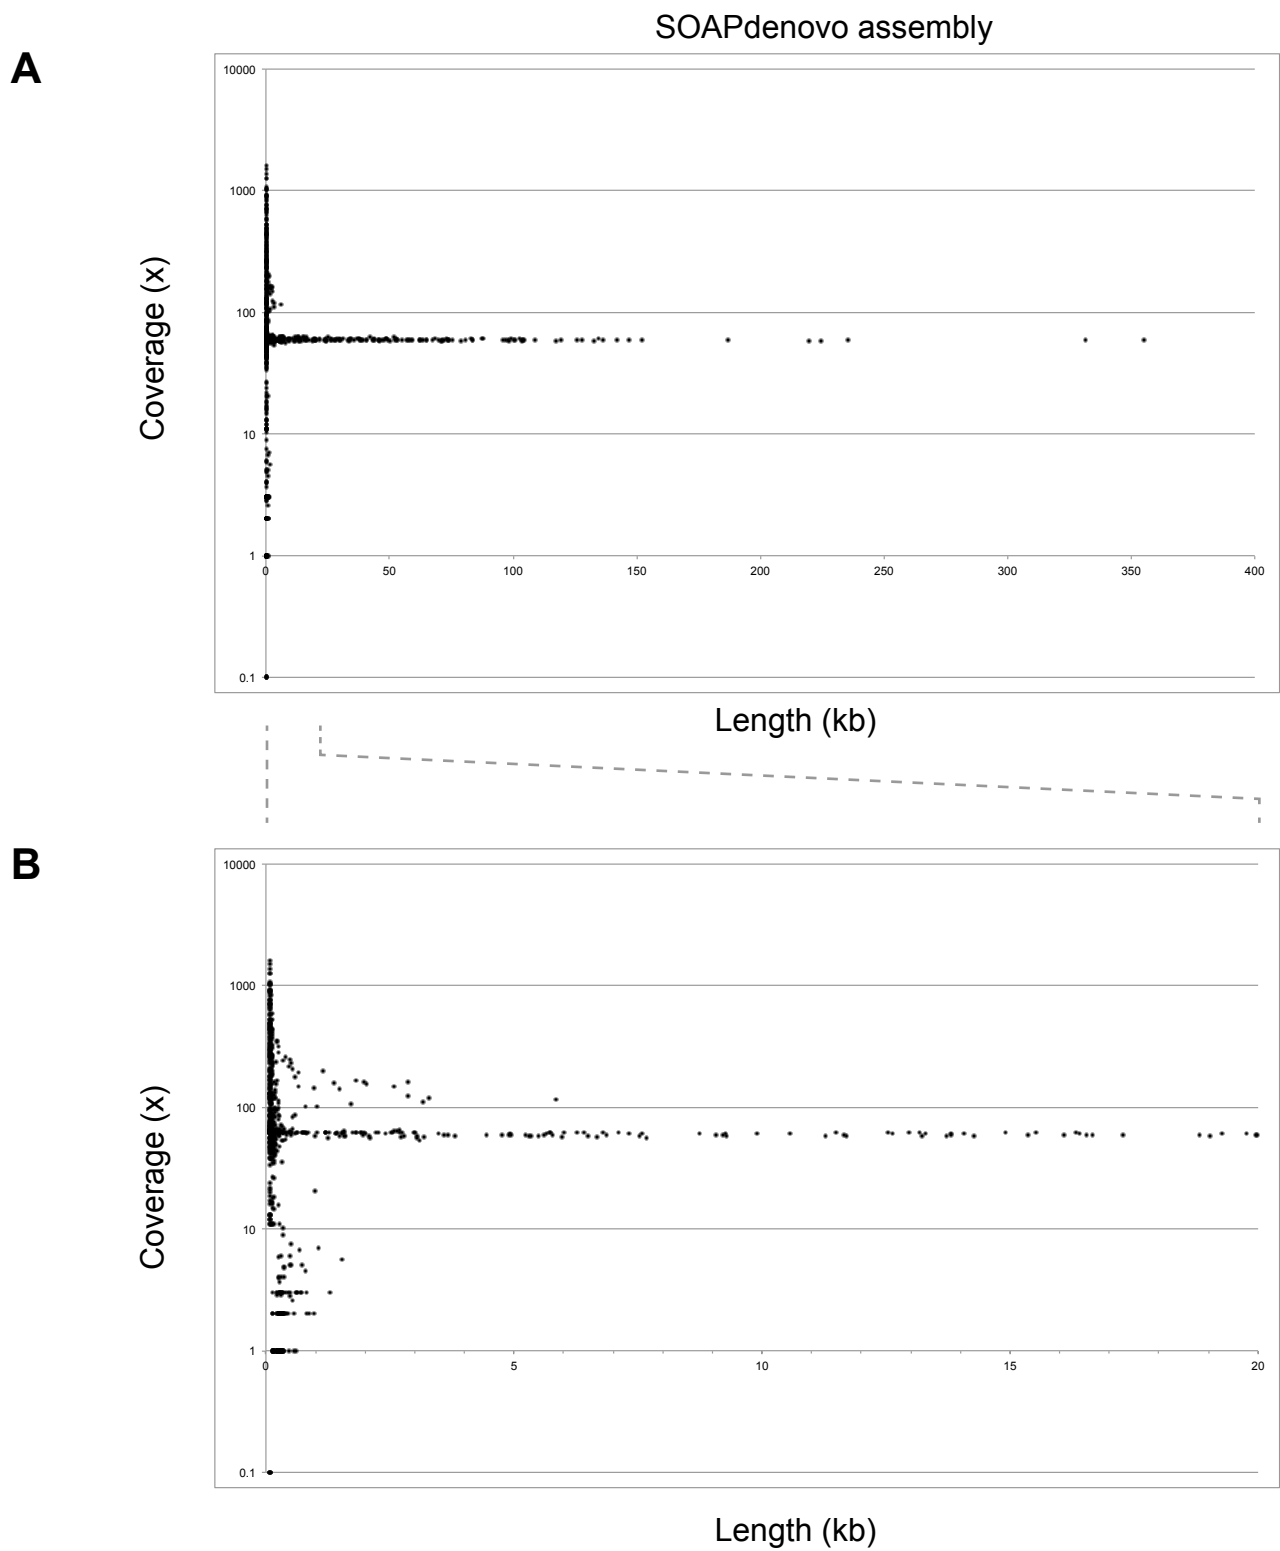

**Figure S2.** CVL plot of a SOAPdenovo2 assembly of *K. phaffii* strain CBS7435 showing (A) all scaffolds, and (B) scaffolds shorter than 20 kb. The Illumina raw data files were the same as those used to make the SPAdes assembly shown in Figure 2.
